# Supplementary material for: Development and validation of lncRNAs-based nomogram for prediction of biochemical recurrence in prostate cancer by bioinformatics analysis
Source: PubMed Central journal article supplement — J Cancer. 2019 Jun 2;10(13):2927–34. doi: 10.7150/jca.31132 (PMC6590034; doi:10.7150/jca.31132), 2019-06-02

Table S1 The five-lncRNAs-associated target genes and miRNAs using online tools

| target genes and miRNAs of five-lncRNAs |         |        |           |        |                 |
|-----------------------------------------|---------|--------|-----------|--------|-----------------|
|                                         | genes   |        |           |        | miRNAs          |
| A1CF                                    | RBFOX1  | PTBP1  | HNRNPA2B1 | U2AF2  | hsa-mir-152-5p  |
| BUD13                                   | RBFOX2  | PTBP2  | HNRNPK    | UCHL5  | hsa-mir-216a-5p |
| CELF6                                   | RBM15   | PUM2   | HNRNPL    | UPF1   | hsa-mir-2277-5p |
| CPEB2                                   | RBM22   | QKI    | HNRNPLL   | YBX3   | hsa-mir-30b-3p  |
| CPEB4                                   | RBM24   | RALY   | HNRNPU    | LIN28A | hsa-mir-4455    |
| CPSF6                                   | RBM27   | METAP2 | HNRNPUL1  | LIN28B | hsa-mir-4477a   |
| DDX3X                                   | RBM28   | PABPC1 | IGF2BP1   | LSM11  | hsa-mir-4511    |
| DDX55                                   | RBM4    | PABPC3 | IGF2BP2   | MATR3  | hsa-mir-4645-3p |
| DDX6                                    | RBM41   | PABPC5 | ILF3      | SRSF9  | hsa-mir-506-5p  |
| EFTUD2                                  | RBM42   | PPIL4  | KHDRBS1   | SUB1   | hsa-mir-6071    |
| ELAVL1                                  | RBM46   | PPRC1  | KHDRBS3   | TARDBP | hsa-mir-7156-3p |
| ELAVL2                                  | RBM4B   | PRPF8  | KHSRP     | TIA1   | hsa-mir-4703-5p |
| ENOX1                                   | RBM5    | TRA2A  | RPS5      | SRSF10 |                 |
| FAM120A                                 | RBM8A   | TROVE2 | SAFB2     | SRSF12 |                 |
| FUS                                     | RBMS3   | U2AF1  | SART3     | SRSF2  |                 |
| SRSF1                                   | SNRNP70 | SND1   | SF3B1     | SF3B4  |                 |

## **Supplementary Figures Legends**

Figure S1 Clinical features before and after propensity score matching between early BCR and long-term BCR survival groups.

Figure S2 The Enrichment Map of five-lncRNAs signature associated biological signaling pathway using GSEA (A, B). Circos plot showed the most correlated and co-expressed genes of PRKAG2-AS1 (C) and CRNDE (D) with respect to genomic coordinates.

Figure S3 Notable pathway enrichment of the target genes (A) and the enrichment in the GO terms: molecular function (B), biological process (C), cellular component (D).

Figure s1

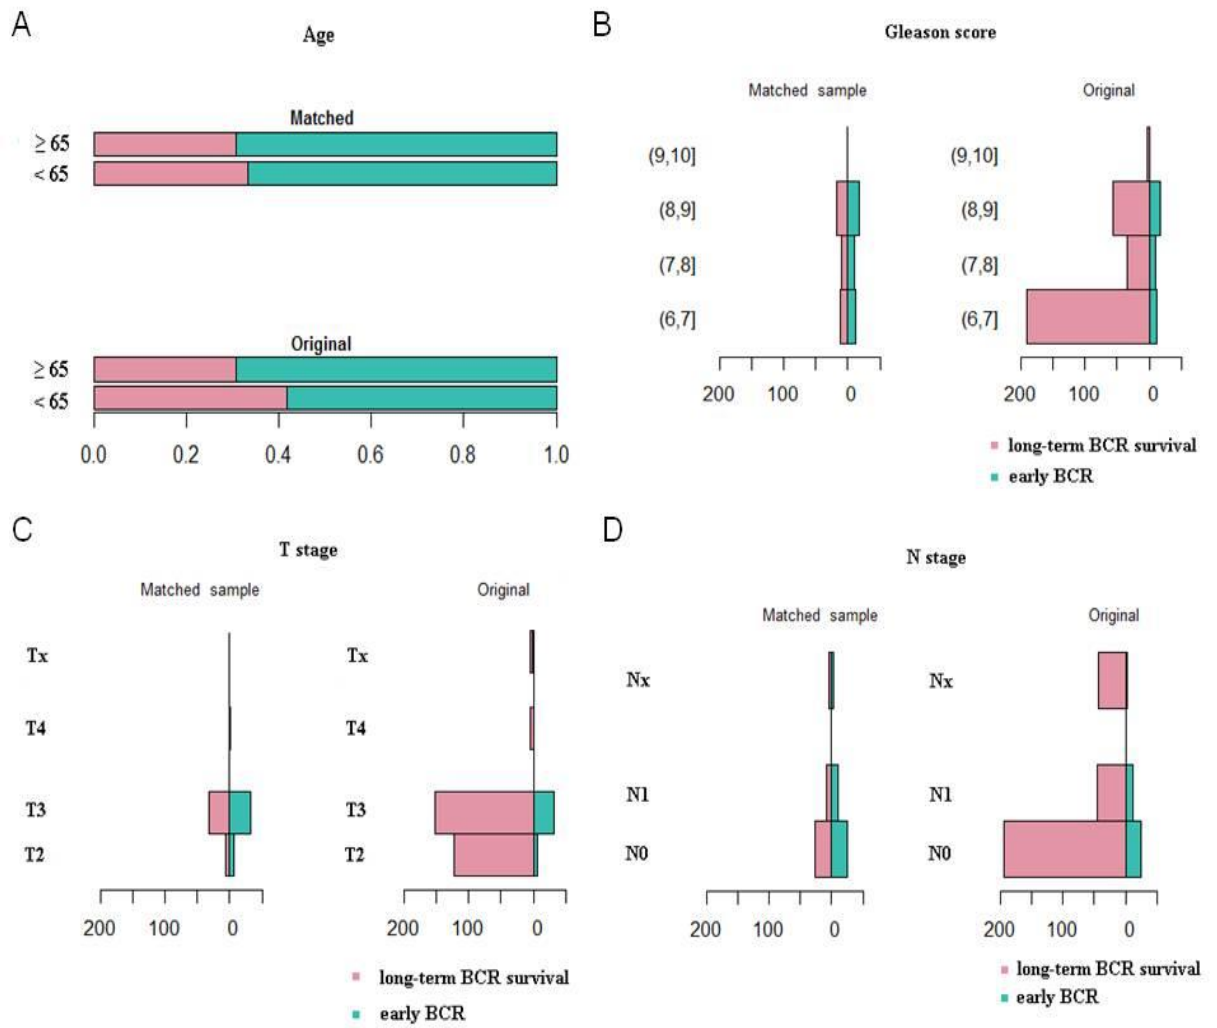

Figure s2

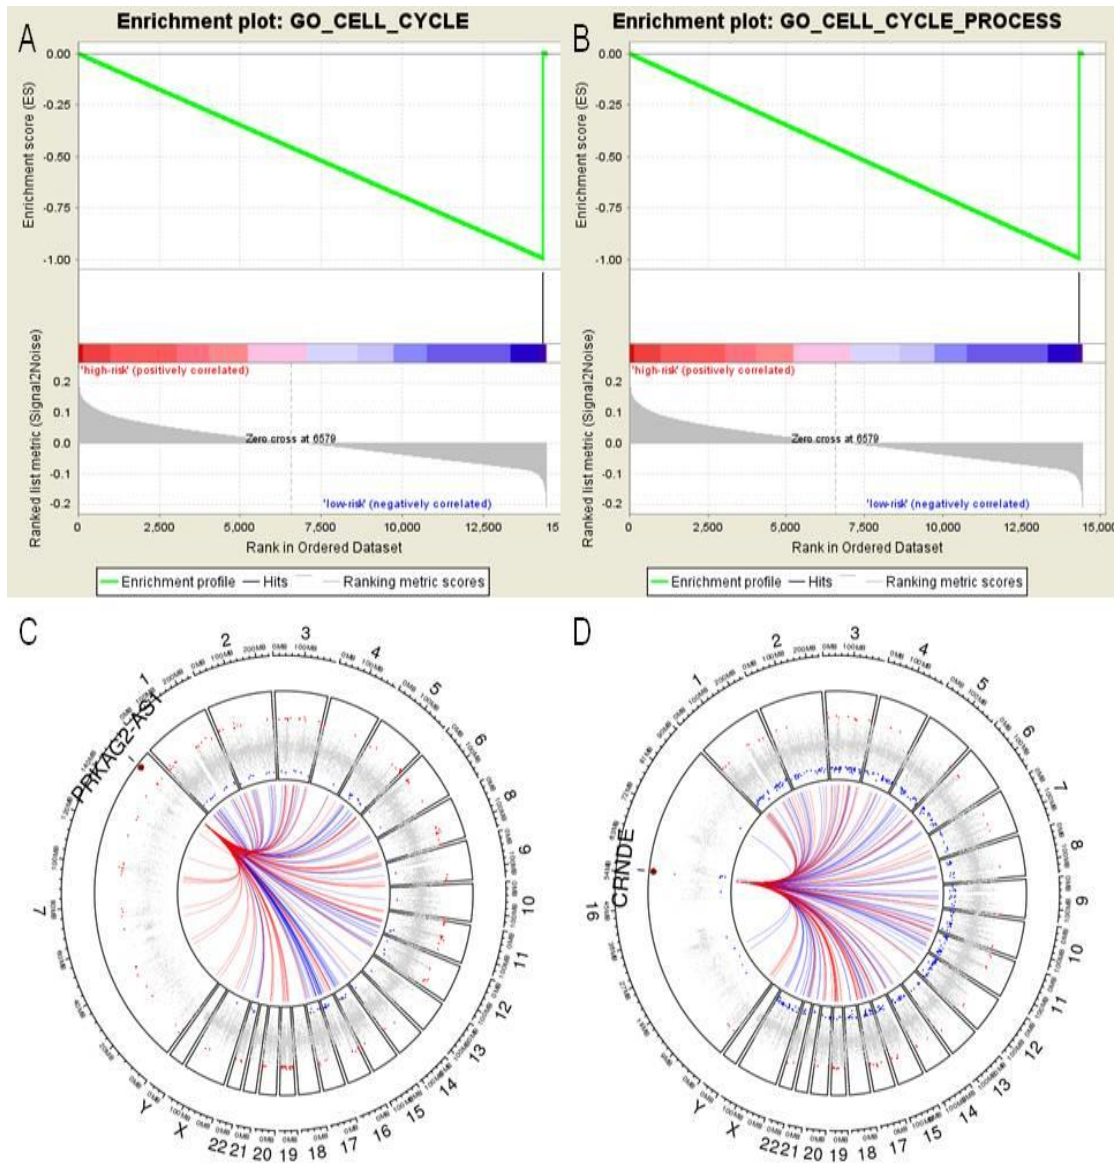

Supplement: jcav10p2927s1.pdf [file jcav10p2927s1.pdf]
